# Supplementary material for: Food Consumed by High School Students during the School Day
Source: MDPI journal article supplement (doi:10.3390/nu12020485), 2020-02-14
Supplement: s1 [file s1]

## **“LA ALIMENTACIÓN DEL ALUMNADO DE SECUNDARIA DURANTE LA JORNADA ESCOLAR EN ANDALUCÍA”**

Estimado/a estudiante:

Estamos realizando un estudio de investigación sobre la alimentación de los/as estudiantes de Secundaria, Bachillerato y Ciclos Formativos durante el tiempo que pasáis en el instituto. Necesitamos tu colaboración para poder realizar este trabajo. Para ello te pedimos, por favor, que rellenes este cuestionario de la forma más sincera posible. Por supuesto, está garantizado que tus datos personales no serán difundidos, asegurándote el total anonimato.

Marca con una CRUZ en la casilla que corresponda. En las preguntas en las que tengas que escribir, por favor, hazlo en MAYÚSCULAS para facilitar su comprensión.

Si necesitas alguna ayuda para cumplimentar el cuestionario, pídelo a las personas que te lo han entregado, o al profesor/a que esté en este momento en el aula.

MUCHAS GRACIAS por tu colaboración.

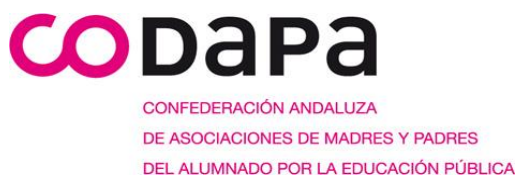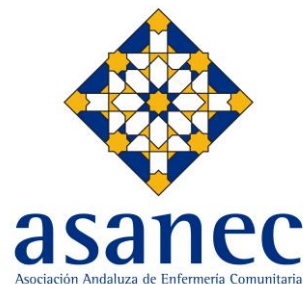

1. Edad \_\_\_\_\_años

2. Sexo: ☐ Hombre ☐ Mujer

3. Curso Académico:

- |                                             |                                                               |
|---------------------------------------------|---------------------------------------------------------------|
| <input type="checkbox"/> 1º de Secundaria   | <input type="checkbox"/> 1º de Ciclo Formativo Grado Medio    |
| <input type="checkbox"/> 2º de Secundaria   | <input type="checkbox"/> 2º de Ciclo Formativo Grado Medio    |
| <input type="checkbox"/> 3º de Secundaria   | <input type="checkbox"/> 1º de Ciclo Formativo Grado Superior |
| <input type="checkbox"/> 4º de Secundaria   | <input type="checkbox"/> 2º de Ciclo Formativo Grado Superior |
| <input type="checkbox"/> 1º de Bachillerato |                                                               |
| <input type="checkbox"/> 2º de Bachillerato |                                                               |

4. ¿Con quién vives? (Marca todas las opciones posibles)

- |                                                      |                                              |
|------------------------------------------------------|----------------------------------------------|
| <input type="checkbox"/> Padre                       | <input type="checkbox"/> Madre               |
| <input type="checkbox"/> Hermano/a                   | <input type="checkbox"/> Abuelo              |
| <input type="checkbox"/> Abuela                      | <input type="checkbox"/> Padrastro/madrastra |
| <input type="checkbox"/> Primo/a                     |                                              |
| <input type="checkbox"/> Otros/as (Especificar)_____ |                                              |

5. Indica la situación laboral de los adultos responsables de ti:

**Padre/Tutor**

**Madre/Tutora**

- |                                                                 |                                                                 |
|-----------------------------------------------------------------|-----------------------------------------------------------------|
| <input type="checkbox"/> Está trabajando                        | <input type="checkbox"/> Está trabajando                        |
| <input type="checkbox"/> Está en paro                           | <input type="checkbox"/> Está en paro                           |
| <input type="checkbox"/> Sólo se dedica a las tareas de la casa | <input type="checkbox"/> Sólo se dedica a las tareas de la casa |

6. Indica los estudios que han realizado los adultos responsables de ti.

**Padre/Tutor**

**Madre/Tutora**

- |                                                         |                                                         |
|---------------------------------------------------------|---------------------------------------------------------|
| <input type="checkbox"/> No sabe leer o escribir        | <input type="checkbox"/> No sabe leer o escribir        |
| <input type="checkbox"/> Sin estudios                   | <input type="checkbox"/> Sin estudios                   |
| <input type="checkbox"/> Estudios Primarios incompletos | <input type="checkbox"/> Estudios Primarios incompletos |
| <input type="checkbox"/> Estudios Primarios completos   | <input type="checkbox"/> Estudios Primarios completos   |
| <input type="checkbox"/> Estudios Secundarios           | <input type="checkbox"/> Estudios Secundarios           |
| <input type="checkbox"/> Estudios Universitarios        | <input type="checkbox"/> Estudios Universitarios        |

7. ¿Desayunas en casa antes de ir al Instituto? ☐ SI ☐ NO

8. Si has contestado que SÍ en la pregunta anterior ¿Qué desayunas?

---

---

---

9. ¿Comes y/o bebes algo en el Instituto durante la mañana?

☐ Siempre ☐ A veces ☐ Nunca

10. ¿Qué sueles comer y/o beber?

Indícalo \_\_\_\_\_

11. Durante la mañana en el Instituto ¿Consumes alguno de estos productos?

Dulces y/o Bollería ☐ Nunca ☐ Siempre ☐ A veces ¿Cuál? \_\_\_\_\_

Paquetes/Snacks ☐ Nunca ☐ Siempre ☐ A veces Especifica de qué es \_\_\_\_\_

Chucherías ☐ Nunca ☐ Siempre ☐ A veces ¿Cuál? \_\_\_\_\_

12. ¿Realizas Ejercicio Físico **fuera del horario del Instituto**?

☐ Sí ☐ NO

13. ¿Cómo describirías tu actividad física diaria?

☐ Sedentaria ☐ Moderada ☐ Activa

☐ Muy Activa ☐ No sé

**MUCHAS GRACIAS**
