# Supplementary material for: Food Consumed by High School Students during the School Day
Source: MDPI journal article supplement (doi:10.3390/nu12020485), 2020-02-14
Supplement: s1 [file s1]

**“FOOD CONSUMED BY HIGH SCHOOL STUDENTS DURING THE SCHOOL DAY IN ANDALUSIA”**

Dear Student:

We are conducting a research study on the dietary habits of Secondary Education, Higher Secondary Education, and Vocational Training students during the school day. We need your collaboration to be able to carry out this work. To do this, please fill out this questionnaire as honestly as possible. Of course, it is guaranteed that your personal data will not be disseminated, ensuring total anonymity.

Mark with a CROSS the appropriate box. For questions you need to write on, please do so in CAPITAL LETTERS so as to make them easier to understand.

If you need any help with completing the questionnaire, ask the people who have given it to you, or the teacher who is currently in the classroom.

THANK YOU VERY MUCH for your collaboration

[sign: CODAPA/Andalusian confederation of associations of mothers and fathers of students for public education]

[sign: asanec/Community Nursing Andalusian Association]

1. Age\_\_\_\_\_years old

2. Sex: ☐ Male ☐ Female

3. Academic course:

☐ 1<sup>st</sup> Secondary Education

☐ 1<sup>st</sup> Medium-level Vocational Training

☐ 2<sup>nd</sup> Secondary Education

☐ 2<sup>nd</sup> Medium-level Vocational Training

☐ 3<sup>rd</sup> Secondary Education

☐ 1<sup>st</sup> Higher-level Vocational Training

☐ 4<sup>th</sup> Secondary Education

☐ 2<sup>nd</sup> Higher-level Vocational Training

☐ 1<sup>st</sup> Higher Sec. Educ.

☐ 2<sup>nd</sup> Higher Sec. Educ.

4. Who do you live with? (tick all the corresponding options)

☐ Father

☐ Mother

☐ Brother/sister

☐ Grandfather

☐ Grandmother

☐ Stepfather/Stepmother

☐ Cousin

☐ Other (specify)\_\_\_\_\_

5. Specify the employment situation of the persons responsible for you.

**Father/Tutor**

**Mother/Tutor**

☐ Working

☐ Working

☐ Unemployed

☐ Unemployed

☐ Domestic chores

☐ Domestic chores

6. Specify the educational level of the persons responsible for you

**Father/Tutor**

**Mother/Tutor**

☐ Does not read/write

☐ Does not read/write

☐ No studies

☐ No studies

☐ Incomplete Primary Studies

☐ Incomplete Primary Studies

☐ Complete Primary Studies

☐ Complete Primary Studies

☐ Secondary Studies

☐ Secondary Studies

☐ University Studies

☐ University Studies

7. Do you have breakfast at home before leaving for school? ☐ YES ☐ NO

8. If your answer was YES, what do you have for breakfast?

---

---

---

9. Do you eat and/or drink anything at school during the morning and afternoon?

☐ Always      ☐ Sometimes      ☐ Never

10. What do you usually eat/drink?

Specify\_\_\_\_\_

11. During the school day, do you consume any of these products?

Pastries/processed baked goods ☐ Never    ☐ Always ☐ Sometimes      Which?\_\_\_\_\_

Crisps/snacks packets ☐ Never ☐ Always ☐ Sometimes      Specify which\_\_\_\_\_

Candy      ☐ Never    ☐ Always ☐ Sometimes      Which?\_\_\_\_\_

12. Do you perform any physical activity outside of school hours?

☐ YES      ☐ NO

13. How would you describe your physical activity?

☐ Sedentary      ☐ Moderate      ☐ Active  
☐ Very active      ☐ I don't know

THANK YOU VERY MUCH
